# Supplementary material for: Effect of ambient air pollution on the incidence of colorectal cancer among a diabetic population: a nationwide nested case–control study in Taiwan
Source: HighWire-hosted journal article supplement (doi:10.1136/bmjopen-2020-036955), 2020-10-01
Supplement: bmjopen-2020-036955supp002_data_supplement.pdf [file bmjopen-2020-036955supp002_data_supplement.pdf]

**Supplemental 2. Adjusted odds ratios (95% CIs) of the associated risk factors for CRC during the follow-up period**

| Variables                                   | Univariate Analysis<br>OR (95% CI) | Multivariate analysis<br>aOR (95% CI) |
|---------------------------------------------|------------------------------------|---------------------------------------|
| PM <sub>2.5</sub> ( $\leq$ Q1 as reference) |                                    |                                       |
| Q1-Q2                                       | 1.03(0.96-1.11)                    | 1.03(0.95-1.11)                       |
| Q2-Q3                                       | 1.05(0.98-1.13)                    | 1.06(0.98-1.15)                       |
| $\geq$ Q3                                   | 1.18(1.09-1.27)                    | 1.19(1.10-1.28)                       |
| Urbanization level (Low as reference)       |                                    |                                       |
| Moderate                                    | 1.06(0.96-1.17)                    | 1.07(0.97-1.19)                       |
| High                                        | 1.06(0.97-1.17)                    | 1.07(0.97-1.18)                       |
| Very high                                   | 1.09(0.99-1.19)                    | 1.08(0.97-1.20)                       |
| Monthly income (0 as reference)             |                                    |                                       |
| 1-15,840                                    | 1.01(0.94-1.08)                    | 0.99(0.92-1.06)                       |
| 15,841-25,000                               | 0.91(0.85-0.97)                    | 0.92(0.86-0.98)                       |
| $\geq$ 25,000                               | 0.88(0.80-0.98)                    | 0.92(0.82-1.02)                       |
| Age (1 years as a unit)                     | 1.06 (1.00-1.12)                   | 1.05(0.99-1.12)                       |
| Medical diseases(No as reference)           |                                    |                                       |
| Crohn disease                               | 1.40(1.12-1.74)                    | 1.29(1.03-1.61)                       |
| Ulcerative colitis                          | 2.14(1.42-3.21)                    | 1.90(1.24-2.89)                       |
| Constipation                                | 1.46(1.37-1.55)                    | 1.37(1.29-1.46)                       |
| Colon polyps                                | 5.91(5.27-6.63)                    | 5.71(5.08-6.41)                       |
| Hypertension                                | 1.10(1.04-1.17)                    | 1.08(1.02-1.15)                       |
| Obesity                                     | 0.99(0.74-1.10)                    | 1.00(0.73-1.10)                       |
| Alcohol-related disease                     | 1.50(1.31-1.72)                    | 1.40(1.21-1.62)                       |
| COPD                                        | 1.07(0.99-1.15)                    | 0.98(0.91-1.06)                       |

|                                |                 |                 |
|--------------------------------|-----------------|-----------------|
| CKD                            | 1.35(1.22-1.50) | 1.18(1.06-1.32) |
| CAD                            | 1.13(1.05-1.20) | 1.07(1.00-1.15) |
| AF                             | 1.27(1.12-1.44) | 1.19(1.04-1.35) |
| Change of aDCSI Score per Year | 1.36(1.26-1.47) | 1.28(1.18-1.38) |
| Medication                     |                 |                 |
| Statin(<28cDDD as reference)   | 0.98(0.93-1.04) | 0.96(0.91-1.01) |
| Aspirin(<28cDDD as reference)  | 1.00(0.95-1.06) | 0.91(0.86-0.97) |
| NSAIDs(<28cDDD as reference)   | 1.03(0.95-1.12) | 0.97(0.89-1.06) |

Abbreviation: OR-Odds Ratio, 95%CI-95% Confidence interval, COPD-Chronic Obstructive Pulmonary Disease, CKD-Chronic kidney disease, aDCSI-the Adapted Diabetes Complications Severity Index, cDDD-Cumulative DDD.

† Adjusted for gender, age, income, urbanization, comorbidities disease, drug use and Change of aDCSI Score per Year.
