# Supplementary material for: Effect of ambient air pollution on the incidence of colorectal cancer among a diabetic population: a nationwide nested case–control study in Taiwan
Source: HighWire-hosted journal article supplement (doi:10.1136/bmjopen-2020-036955), 2020-10-01
Supplement: bmjopen-2020-036955supp003_data_supplement.pdf [file bmjopen-2020-036955supp003_data_supplement.pdf]

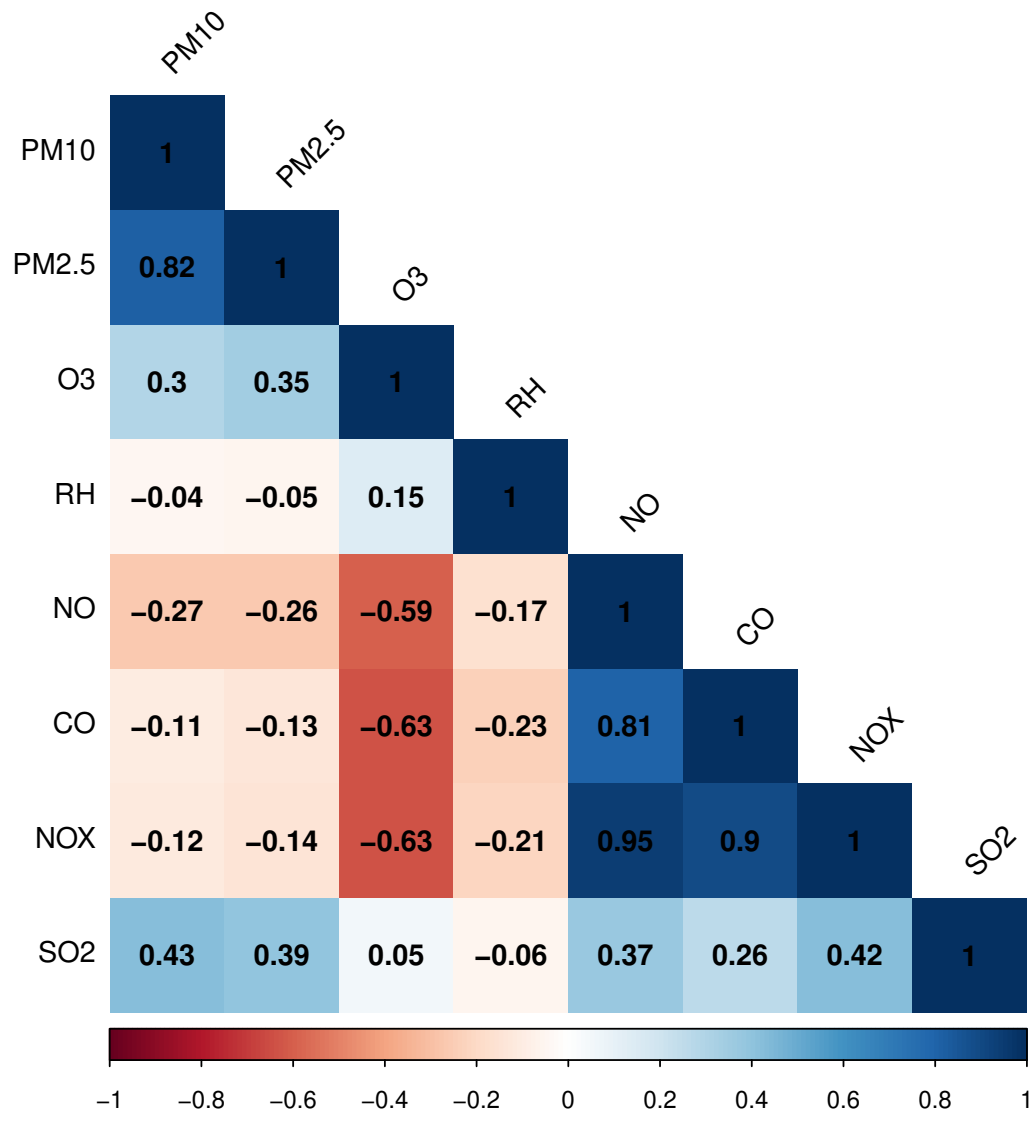

Supplemental 3. Correlation coefficients of average concentrations of air pollutions in Taiwan during 1999-2013.
